# Supplementary material
Source: publisher site journal article supplement (https://www.dovepress.com/get_supplementary_file.php?f=180520T1.xlsx)
Supplement: Supplementary file 1 [file get_supplementary_file.php]

## Sheet: Table S1
Gene	Sequences
Pim1-siRNA1	5′-GGUGUGUGGAGAUAUUCCUTT-3’ 5′-AGGAAUAUCUCCACACACCTT-3’
Pim1-siRNA2	5′-GAUAUGGUGUGUGGAGAUA-3′ 5′-UAUCUCCACACACCAUAUC-3′
Control	5′-UUCUCCGAACGUGUCACGUTT-3’ 5′-ACGUGACACGUUCGGAGAATT-3’
